# Supplementary material for: Genital ulcer severity score and genital health quality of life in Behçet’s disease
Source: Springer Nature journal article supplement (doi:10.1186/s13023-015-0341-7), 2015-09-22

(Graph 1), GUSS, BDCAF and GHQoL differences based on gender

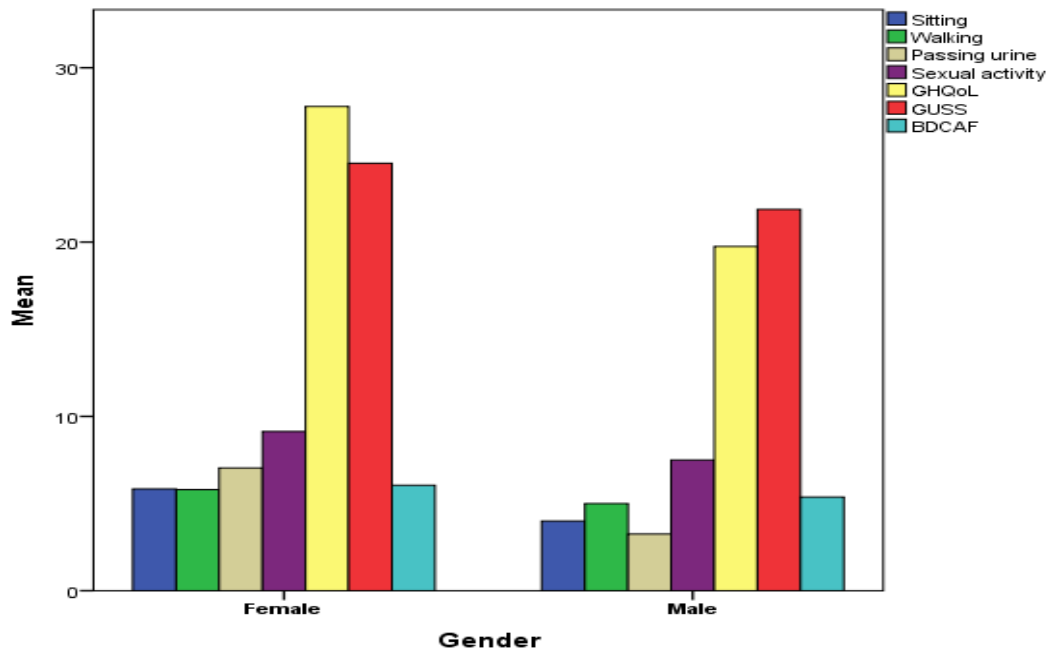

(Graph 2), GUSS, BDCAF and GHQoL differences based on patients' age range

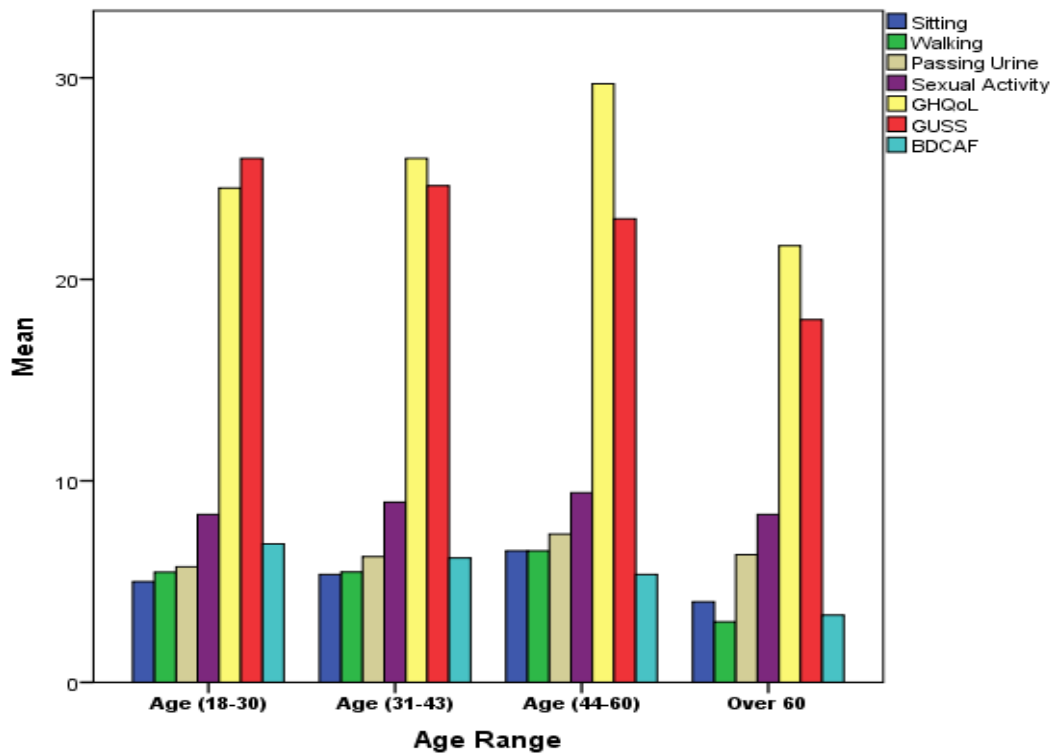

Supplement: MOESM1 [file 9776260]
